# Supplementary material for: Food Supplement Use Differs from the Recommendations in Pregnant Women: A Multinational Survey
Source: MDPI journal article supplement (doi:10.3390/nu14142909), 2022-07-15
Supplement: s1 [file s1]

**Table S1.** Places from which the women bought or obtained food supplements reported by pregnant women in four European countries.

|                                    | Finland       | Italy         | Poland        | United Kingdom |                              |
|------------------------------------|---------------|---------------|---------------|----------------|------------------------------|
| Place of purchase, n (%)           | <i>n</i> =536 | <i>n</i> =467 | <i>n</i> =553 | <i>n</i> =112  | <i>P</i> -value <sup>a</sup> |
| Doctor, midwife, health visitor    | 14 (2.6)      | 13 (2.8)      | 23 (4.2)      | 19 (17.0)      | <0.001                       |
| Pharmacy, without prescription     | 492 (91.8)    | 336 (72.0)    | 527 (95.3)    | 49 (43.8)      | <0.001                       |
| Pharmacy, with prescription        | 16 (3.0)      | 161 (34.5)    | 117 (21.2)    | 6 (5.4)        | <0.001                       |
| Supermarket / grocery store        | 123 (23.0)    | 15 (3.2)      | 8 (1.5)       | 49 (43.8)      | <0.001                       |
| Health/herbal store                | 84 (15.7)     | 13 (2.8)      | 5 (0.9)       | 14 (12.5)      | <0.001                       |
| Domestic online store              | 40 (7.5)      | 27 (5.8)      | 46 (8.3)      | 15 (13.4)      | 0.288                        |
| International online store         | 18 (3.4)      | 12 (2.6)      | 6 (1.1)       | 3 (2.7)        | 0.558                        |
| Network marketing (direct selling) | 10 (1.9)      | 4 (0.9)       | 2 (0.4)       | 1 (0.9)        | 0.582                        |
| Other <sup>b</sup>                 | 4 (0.7)       | 7 (1.5)       | 15 (2.7)      | 4 (3.6)        | 0.252                        |

<sup>a</sup> Comparison among the countries, Chi-square test with Bonferroni correction.<sup>b</sup> Gym or health spa, work, family, nutritionist, online pharmacy.

**Table S2.** Perceived recommendations for food supplement use before and during pregnancy and during breastfeeding as reported by pregnant women in four European countries.

|                                  | Finland    | Italy      | Poland     | United Kingdom |                             |
|----------------------------------|------------|------------|------------|----------------|-----------------------------|
| Statement, n (%)                 | n=536      | n=540      | n=585      | n=121          | <i>P-value</i> <sup>a</sup> |
| <b>Multivitamin</b>              |            |            |            |                |                             |
| Recommended before pregnancy     | 226 (42.2) | 139 (25.3) | 339 (57.7) | 67 (55.4)      | <0.001                      |
| Recommended during pregnancy     | 374 (69.8) | 394 (71.6) | 488 (83.0) | 90 (74.4)      | <0.001                      |
| Recommended during breastfeeding | 256 (47.8) | 166 (30.2) | 364 (61.9) | 57 (47.1)      | <0.001                      |
| Not recommended                  | 62 (11.6)  | 26 (4.7)   | 28 (4.8)   | 7 (5.8)        | <0.001                      |
| <b>Vitamin A</b>                 |            |            |            |                |                             |
| Recommended before pregnancy     | 4 (0.8)    | 51 (9.3)   | 44 (7.5)   | 4 (3.9)        | <0.001                      |
| Recommended during pregnancy     | 2 (0.4)    | 106 (19.3) | 60 (10.2)  | 5 (4.1)        | <0.001                      |
| Recommended during breastfeeding | 3 (0.6)    | 49 (8.9)   | 35 (6.0)   | 3 (2.5)        | <0.001                      |
| Not recommended                  | 447 (83.4) | 132 (24.0) | 220 (37.4) | 75 (62.0)      | <0.001                      |
| <b>Folic acid</b>                |            |            |            |                |                             |
| Recommended before pregnancy     | 455 (85.0) | 472 (85.8) | 544 (92.5) | 88 (72.7)      | <0.001                      |
| Recommended during pregnancy     | 441 (82.3) | 429 (78.0) | 504 (85.7) | 82 (67.8)      | <0.001                      |
| Recommended during breastfeeding | 55 (10.3)  | 64 (11.6)  | 117 (19.9) | 8 (6.6)        | <0.001                      |
| Not recommended                  | 16 (3.0)   | 1 (0.2)    | 5 (0.9)    | 2 (1.7)        | 0.003                       |
| <b>Vitamin D</b>                 |            |            |            |                |                             |
| Recommended before pregnancy     | 253 (47.2) | 94 (17.1)  | 274 (46.6) | 48 (39.7)      | <0.001                      |
| Recommended during pregnancy     | 328 (61.2) | 175 (31.8) | 325 (55.3) | 73 (60.3)      | <0.001                      |
| Recommended during breastfeeding | 255 (47.6) | 119 (21.6) | 250 (42.5) | 50 (41.3)      | <0.001                      |
| Not recommended                  | 47 (8.8)   | 58 (10.6)  | 46 (7.8)   | 3 (2.5)        | 0.180                       |
| <b>Vitamin C</b>                 |            |            |            |                |                             |
| Recommended before pregnancy     | 50 (9.3)   | 108 (19.6) | 143 (24.3) | 18 (14.9)      | <0.001                      |
| Recommended during pregnancy     | 56 (10.5)  | 163 (29.6) | 132 (22.5) | 25 (20.7)      | <0.001                      |
| Recommended during breastfeeding | 40 (7.5)   | 102 (18.6) | 85 (14.5)  | 14 (11.6)      | <0.001                      |
| Not recommended                  | 207 (38.6) | 74 (13.5)  | 139 (23.6) | 29 (24.0)      | <0.001                      |
| <b>Iodine</b>                    |            |            |            |                |                             |
| Recommended before pregnancy     | 12 (2.2)   | 33 (6.1)   | 134 (23.0) | 3 (2.5)        | <0.001                      |
| Recommended during pregnancy     | 24 (4.5)   | 76 (14.1)  | 253 (43.3) | 5 (4.1)        | <0.001                      |
| Recommended during breastfeeding | 10 (1.9)   | 33 (6.1)   | 96 (16.4)  | 3 (2.5)        | <0.001                      |

Koivuniemi *et al.* (2022) Food Supplement Use Differs from the Recommendations in Pregnant Women:  
A Multinational Survey. *Nutrients*.

|                                                  |            |            |            |           |        |
|--------------------------------------------------|------------|------------|------------|-----------|--------|
| Not recommended                                  | 239 (44.6) | 116 (21.5) | 76 (13.0)  | 33 (27.3) | <0.001 |
| <b>Calcium</b>                                   |            |            |            |           |        |
| Recommended before pregnancy                     | 69 (12.9)  | 72 (13.4)  | 123 (21.1) | 15 (12.4) | 0.002  |
| Recommended during pregnancy                     | 184 (34.3) | 176 (32.7) | 195 (33.4) | 31 (25.6) | 1.000  |
| Recommended during breastfeeding                 | 126 (23.5) | 155 (28.8) | 157 (26.9) | 23 (19.0) | 0.396  |
| Not recommended                                  | 133 (24.8) | 71 (13.2)  | 90 (15.4)  | 25 (20.7) | <0.001 |
| <b>Iron</b>                                      |            |            |            |           |        |
| Recommended before pregnancy                     | 26 (4.9)   | 85 (15.8)  | 131 (22.4) | 22 (18.2) | <0.001 |
| Recommended during pregnancy                     | 347 (64.7) | 343 (63.6) | 340 (58.2) | 51 (42.2) | <0.001 |
| Recommended during breastfeeding                 | 62 (11.6)  | 123 (22.8) | 144 (24.7) | 23 (19.0) | <0.001 |
| Not recommended                                  | 90 (16.8)  | 37 (6.9)   | 59 (10.1)  | 19 (15.7) | <0.001 |
| <b>Vitamin B12</b>                               |            |            |            |           |        |
| Recommended before pregnancy                     | 49 (9.1)   | 98 (17.8)  | 164 (27.9) | 20 (16.5) | <0.001 |
| Recommended during pregnancy                     | 75 (14.0)  | 226 (41.1) | 224 (38.1) | 24 (19.8) | <0.001 |
| Recommended during breastfeeding                 | 35 (6.5)   | 93 (16.9)  | 110 (18.7) | 12 (9.9)  | <0.001 |
| Not recommended                                  | 172 (32.1) | 63 (11.5)  | 72 (12.2)  | 24 (19.8) | <0.001 |
| <b>Vitamin B (other than B12 and folic acid)</b> |            |            |            |           |        |
| Recommended before pregnancy                     | 27 (5.0)   | 103 (18.7) | 140 (23.8) | 12 (9.9)  | <0.001 |
| Recommended during pregnancy                     | 39 (7.3)   | 204 (37.1) | 179 (30.4) | 16 (13.2) | <0.001 |
| Recommended during breastfeeding                 | 16 (3.0)   | 87 (15.8)  | 89 (15.1)  | 8 (6.6)   | <0.001 |
| Not recommended                                  | 185 (34.5) | 57 (10.4)  | 79 (13.4)  | 26 (21.5) | <0.001 |
| <b>Vitamin E</b>                                 |            |            |            |           |        |
| Recommended before pregnancy                     | 12 (2.2)   | 52 (9.5)   | 82 (14.0)  | 5 (4.1)   | <0.001 |
| Recommended during pregnancy                     | 10 (1.9)   | 100 (18.2) | 80 (13.6)  | 5 (4.1)   | <0.001 |
| Recommended during breastfeeding                 | 9 (1.7)    | 60 (10.9)  | 51 (8.7)   | 3 (2.5)   | <0.001 |
| Not recommended                                  | 215 (40.1) | 85 (15.5)  | 118 (20.1) | 31 (25.6) | <0.001 |
| <b>Zinc</b>                                      |            |            |            |           |        |
| Recommended before pregnancy                     | 14 (2.6)   | 35 (6.5)   | 70 (12.0)  | 5 (4.1)   | <0.001 |
| Recommended during pregnancy                     | 14 (2.6)   | 73 (13.5)  | 85 (14.6)  | 6 (5.0)   | <0.001 |
| Recommended during breastfeeding                 | 11 (2.1)   | 31 (5.8)   | 47 (8.1)   | 3 (2.5)   | <0.001 |
| Not recommended                                  | 201 (37.5) | 100 (18.6) | 119 (20.4) | 29 (24.0) | <0.001 |
| <b>Selenium</b>                                  |            |            |            |           |        |
| Recommended before pregnancy                     | 9 (1.7)    | 26 (4.8)   | 59 (10.1)  | 2 (1.7)   | <0.001 |
| Recommended during pregnancy                     | 10 (1.9)   | 62 (11.5)  | 86 (14.7)  | 3 (2.5)   | <0.001 |

Koivuniemi *et al.* (2022) Food Supplement Use Differs from the Recommendations in Pregnant Women:  
A Multinational Survey. *Nutrients*.

|                                  |            |            |            |           |        |
|----------------------------------|------------|------------|------------|-----------|--------|
| Recommended during breastfeeding | 8 (1.5)    | 26 (4.8)   | 45 (7.7)   | 2 (1.7)   | <0.001 |
| Not recommended                  | 208 (38.8) | 115 (21.3) | 126 (21.6) | 29 (24.0) | <0.001 |
| <b>Chromium</b>                  |            |            |            |           |        |
| Recommended before pregnancy     | 2 (0.4)    | 16 (3.0)   | 44 (7.5)   | 2 (1.7)   | <0.001 |
| Recommended during pregnancy     | 2 (0.4)    | 45 (8.4)   | 50 (8.6)   | 1 (0.8)   | <0.001 |
| Recommended during breastfeeding | 2 (0.4)    | 18 (3.3)   | 28 (4.8)   | 2 (1.7)   | <0.001 |
| Not recommended                  | 212 (39.6) | 126 (23.4) | 147 (25.2) | 32 (26.5) | <0.001 |
| <b>Magnesium</b>                 |            |            |            |           |        |
| Recommended before pregnancy     | 25 (4.7)   | 99 (18.4)  | 190 (32.5) | 5 (4.1)   | <0.001 |
| Recommended during pregnancy     | 89 (16.6)  | 263 (48.8) | 323 (55.3) | 13 (10.7) | <0.001 |
| Recommended during breastfeeding | 27 (5.0)   | 97 (18.0)  | 151 (25.9) | 6 (5.0)   | <0.001 |
| Not recommended                  | 167 (31.2) | 45 (8.4)   | 65 (11.1)  | 25 (20.7) | <0.001 |
| <b>Manganese</b>                 |            |            |            |           |        |
| Recommended before pregnancy     | 2 (0.4)    | 28 (5.2)   | 43 (7.4)   | 1 (0.8)   | <0.001 |
| Recommended during pregnancy     | 2 (0.4)    | 66 (12.2)  | 50 (8.6)   | 2 (1.7)   | <0.001 |
| Recommended during breastfeeding | 2 (0.4)    | 28 (5.2)   | 27 (4.6)   | 1 (0.8)   | <0.001 |
| Not recommended                  | 210 (39.2) | 91 (16.9)  | 130 (22.3) | 31 (25.6) | <0.001 |

<sup>a</sup> Comparison between the countries, Chi-square test with Bonferroni correction.

**Table S3.** Non-pregnancy related health conditions of the pregnant women participating in the study.

|                                                      | All        | Finland    | Italy     | Poland     | United Kingdom |                      |
|------------------------------------------------------|------------|------------|-----------|------------|----------------|----------------------|
| Health conditions, n (%)                             | n=1762     | n=536      | n=539     | n=569      | n=118          | P-value <sup>a</sup> |
| Diabetes <sup>b</sup>                                | 17 (1.0)   | 7 (1.3)    | 5 (0.9)   | 5 (0.9)    | 0 (0.0)        | 1.000                |
| Heart disease/ high blood pressure/ high cholesterol | 38 (2.2)   | 18 (3.4)   | 6 (1.1)   | 13 (2.3)   | 1 (0.8)        | 0.354                |
| Thyroid disease                                      | 274 (15.6) | 52 (9.7)   | 70 (13.0) | 142 (25.0) | 10 (8.5)       | <0.001               |
| Intestinal health conditions <sup>c</sup>            | 221 (12.5) | 81 (15.1)  | 73 (13.5) | 43 (7.6)   | 24 (20.3)      | <0.001               |
| Allergy/ asthma                                      | 340 (19.3) | 170 (31.7) | 67 (12.4) | 86 (15.1)  | 17 (14.4)      | <0.001               |
| Rheumatism/ arthritis                                | 29 (1.6)   | 5 (0.9)    | 12 (2.2)  | 9 (1.6)    | 3 (2.5)        | 1.000                |
| Migraine/ frequent headaches                         | 273 (15.5) | 119 (22.2) | 52 (9.6)  | 90 (15.8)  | 12 (10.2)      | <0.001               |
| Chronic anxiety/ depression                          | 107 (6.1)  | 49 (9.1)   | 27 (5.0)  | 16 (2.8)   | 15 (12.7)      | <0.001               |

<sup>a</sup> Comparison between the countries, Chi-square test with Bonferroni correction.

<sup>b</sup> Type 1 or type 2 diabetes.

<sup>c</sup> Health conditions including celiac disease, inflammatory bowel disease, irritable bowel syndrome and/or food intolerance.

**Table S4.** Frequency of food supplement use during pregnancy as reported by pregnant women in four European countries.

| Finland               | Food supplement users |                              | Frequency of using food supplements, <i>n</i> (%) of users |                   |                   |                   |                       |
|-----------------------|-----------------------|------------------------------|------------------------------------------------------------|-------------------|-------------------|-------------------|-----------------------|
|                       | Total <i>n</i>        | <i>n</i> (%) of participants | 7 days a week                                              | 5 - 6 days a week | 3 - 4 days a week | 1 - 2 days a week | Less than once a week |
| Prenatal multivitamin | 529                   | 432 (81.7)                   | 356 (82.4)                                                 | 41 (9.5)          | 23 (5.3)          | 0 (0.0)           | 12 (2.8)              |
| Other multivitamin    | 524                   | 160 (30.5)                   | 108 (67.5)                                                 | 10 (6.3)          | 14 (8.8)          | 8 (5.0)           | 20 (12.5)             |
| Vitamin A             | 528                   | 7 (1.3)                      | 1 (14.3)                                                   | 0 (0.0)           | 0 (0.0)           | 0 (0.0)           | 6 (85.7)              |
| Folic acid            | 527                   | 146 (27.7)                   | 110 (75.3)                                                 | 11 (7.5)          | 7 (4.8)           | 5 (3.4)           | 13 (8.9)              |
| Vitamin B12           | 528                   | 58 (11.0)                    | 29 (50.0)                                                  | 7 (12.1)          | 5 (8.6)           | 4 (6.9)           | 13 (22.4)             |
| Other vitamin B's     | 526                   | 39 (7.4)                     | 23 (59.0)                                                  | 1 (2.6)           | 4 (10.3)          | 0 (0.0)           | 11 (28.2)             |
| Vitamin C             | 528                   | 73 (13.8)                    | 31 (42.5)                                                  | 4 (5.5)           | 7 (9.6)           | 4 (5.5)           | 27 (37.0)             |
| Vitamin D             | 529                   | 202 (38.2)                   | 130 (64.4)                                                 | 17 (8.4)          | 18 (8.9)          | 10 (5.0)          | 27 (13.4)             |
| Vitamin E             | 528                   | 12 (2.3)                     | 5 (41.7)                                                   | 0 (0.0)           | 0 (0.0)           | 0 (0.0)           | 7 (58.3)              |
| Iodine                | 529                   | 14 (2.6)                     | 3 (21.4)                                                   | 1 (7.1)           | 0 (0.0)           | 1 (7.1)           | 9 (64.3)              |
| Calcium               | 529                   | 130 (24.6)                   | 74 (56.9)                                                  | 14 (10.8)         | 15 (11.5)         | 12 (9.2)          | 15 (11.5)             |
| Iron                  | 526                   | 208 (39.5)                   | 122 (58.7)                                                 | 21 (10.1)         | 33 (15.9)         | 10 (4.8)          | 22 (10.6)             |
| Zinc                  | 528                   | 51 (9.7)                     | 18 (35.3)                                                  | 2 (3.9)           | 5 (9.8)           | 5 (9.8)           | 21 (41.2)             |
| Selenium              | 529                   | 8 (1.5)                      | 1 (12.5)                                                   | 1 (12.5)          | 0 (0.0)           | 0 (0.0)           | 6 (75.0)              |
| Magnesium             | 528                   | 159 (30.1)                   | 62 (39.0)                                                  | 22 (13.8)         | 24 (15.1)         | 23 (14.5)         | 28 (17.6)             |
| Manganese             | 528                   | 5 (0.9)                      | 0 (0.0)                                                    | 1 (20.0)          | 0 (0.0)           | 0 (0.0)           | 4 (80.0)              |
| Chromium              | 529                   | 6 (1.1)                      | 1 (16.7)                                                   | 0 (0.0)           | 0 (0.0)           | 0 (0.0)           | 5 (83.3)              |

| Italy                 | Food supplement users |                              | Frequency of using food supplements, <i>n</i> (%) of users |                   |                   |                   |                       |
|-----------------------|-----------------------|------------------------------|------------------------------------------------------------|-------------------|-------------------|-------------------|-----------------------|
|                       | Total <i>n</i>        | <i>n</i> (%) of participants | 7 days a week                                              | 5 - 6 days a week | 3 - 4 days a week | 1 - 2 days a week | Less than once a week |
| Prenatal multivitamin | 469                   | 354 (75.5)                   | 333 (94.1)                                                 | 7 (2.0)           | 9 (2.5)           | 2 (0.6)           | 3 (0.8)               |
| Other multivitamin    | 461                   | 164 (35.6)                   | 144 (87.8)                                                 | 2 (1.2)           | 10 (6.1)          | 2 (1.2)           | 6 (3.7)               |
| Vitamin A             | 460                   | 40 (8.7)                     | 25 (62.5)                                                  | 1 (2.5)           | 4 (10.0)          | 3 (7.5)           | 7 (17.5)              |
| Folic acid            | 464                   | 232 (50.0)                   | 214 (92.2)                                                 | 3 (1.3)           | 6 (2.6)           | 4 (1.7)           | 5 (2.2)               |
| Vitamin B12           | 459                   | 60 (13.1)                    | 43 (71.7)                                                  | 1 (1.7)           | 5 (8.3)           | 4 (6.7)           | 7 (11.7)              |
| Other vitamin B's     | 461                   | 70 (15.2)                    | 50 (71.4)                                                  | 1 (1.4)           | 6 (8.6)           | 5 (7.1)           | 8 (11.4)              |
| Vitamin C             | 458                   | 57 (12.4)                    | 34 (59.6)                                                  | 3 (5.3)           | 7 (12.3)          | 5 (8.8)           | 8 (14.0)              |
| Vitamin D             | 458                   | 67 (14.6)                    | 39 (58.2)                                                  | 0 (0.0)           | 4 (6.0)           | 15 (22.4)         | 9 (13.4)              |
| Vitamin E             | 456                   | 31 (6.8)                     | 19 (61.3)                                                  | 0 (0.0)           | 1 (3.2)           | 4 (12.9)          | 7 (22.6)              |
| Iodine                | 458                   | 27 (5.9)                     | 19 (70.4)                                                  | 0 (0.0)           | 0 (0.0)           | 1 (3.7)           | 7 (25.9)              |
| Calcium               | 457                   | 33 (7.2)                     | 21 (63.6)                                                  | 1 (3.0)           | 3 (9.1)           | 2 (6.1)           | 6 (18.2)              |
| Iron                  | 461                   | 148 (32.1)                   | 130 (87.8)                                                 | 5 (3.4)           | 4 (2.7)           | 5 (3.4)           | 4 (2.7)               |
| Zinc                  | 457                   | 25 (5.5)                     | 16 (64.0)                                                  | 0 (0.0)           | 1 (4.0)           | 1 (4.0)           | 7 (28.0)              |
| Selenium              | 459                   | 22 (4.8)                     | 14 (63.6)                                                  | 0 (0.0)           | 0 (0.0)           | 1 (4.5)           | 7 (31.8)              |
| Magnesium             | 459                   | 127 (27.7)                   | 82 (64.6)                                                  | 4 (3.1)           | 19 (15.0)         | 11 (8.7)          | 11 (8.7)              |
| Manganese             | 456                   | 18 (3.9)                     | 9 (50.0)                                                   | 1 (5.6)           | 1 (5.6)           | 1 (5.6)           | 6 (33.3)              |
| Chromium              | 459                   | 15 (3.3)                     | 7 (46.7)                                                   | 0 (0.0)           | 1 (6.7)           | 1 (6.7)           | 6 (40.0)              |

| Poland                | Food supplement users |                              | Frequency of using food supplements, <i>n</i> (%) of users |                   |                   |                   |                       |
|-----------------------|-----------------------|------------------------------|------------------------------------------------------------|-------------------|-------------------|-------------------|-----------------------|
|                       | Total n               | <i>n</i> (%) of participants | 7 days a week                                              | 5 - 6 days a week | 3 - 4 days a week | 1 - 2 days a week | Less than once a week |
| Prenatal multivitamin | 555                   | 504 (90.8)                   | 474 (94.0)                                                 | 12 (2.4)          | 12 (2.4)          | 2 (0.4)           | 4 (0.8)               |
| Other multivitamin    | 551                   | 200 (36.3)                   | 177 (88.5)                                                 | 9 (4.5)           | 7 (3.5)           | 3 (1.5)           | 4 (2.0)               |
| Vitamin A             | 551                   | 26 (4.7)                     | 21 (80.8)                                                  | 0 (0.0)           | 1 (3.8)           | 2 (7.7)           | 2 (7.7)               |
| Folic acid            | 550                   | 179 (32.5)                   | 166 (92.7)                                                 | 2 (1.1)           | 7 (3.9)           | 2 (1.1)           | 2 (1.1)               |
| Vitamin B12           | 549                   | 66 (12.0)                    | 54 (81.8)                                                  | 3 (4.5)           | 3 (4.5)           | 2 (3.0)           | 4 (6.1)               |
| Other vitamin B's     | 550                   | 39 (7.1)                     | 23 (59.0)                                                  | 1 (2.6)           | 4 (10.3)          | 0 (0.0)           | 11 (28.2)             |
| Vitamin C             | 550                   | 90 (16.4)                    | 49 (54.4)                                                  | 5 (5.6)           | 10 (11.1)         | 11 (12.2)         | 15 (16.7)             |
| Vitamin D             | 550                   | 111 (20.2)                   | 90 (81.1)                                                  | 2 (1.8)           | 11 (9.9)          | 4 (3.6)           | 4 (3.6)               |
| Vitamin E             | 550                   | 21 (3.8)                     | 16 (76.2)                                                  | 1 (4.8)           | 1 (4.8)           | 0 (0.0)           | 3 (14.3)              |
| Iodine                | 550                   | 66 (12.0)                    | 61 (92.4)                                                  | 3 (4.5)           | 1 (1.5)           | 0 (0.0)           | 1 (1.5)               |
| Calcium               | 551                   | 49 (8.9)                     | 25 (51.0)                                                  | 2 (4.1)           | 4 (8.2)           | 10 (20.4)         | 8 (16.3)              |
| Iron                  | 551                   | 147 (26.7)                   | 124 (84.4)                                                 | 4 (2.7)           | 8 (5.4)           | 5 (3.4)           | 6 (4.1)               |
| Zinc                  | 551                   | 18 (3.3)                     | 13 (72.2)                                                  | 0 (0.0)           | 1 (5.6)           | 2 (11.1)          | 2 (11.1)              |
| Selenium              | 551                   | 22 (4.0)                     | 15 (68.2)                                                  | 1 (4.5)           | 1 (4.5)           | 1 (4.5)           | 4 (18.2)              |
| Magnesium             | 551                   | 270 (49.0)                   | 215 (79.6)                                                 | 9 (3.3)           | 16 (5.9)          | 10 (3.7)          | 20 (7.4)              |
| Manganese             | 550                   | 13 (23.6)                    | 11 (84.6)                                                  | 0 (0.0)           | 0 (0.0)           | 0 (0.0)           | 2 (15.4)              |
| Chromium              | 552                   | 11 (2.0)                     | 9 (81.8)                                                   | 0 (0.0)           | 1 (9.1)           | 0 (0.0)           | 1 (9.1)               |



| United Kingdom        | Food supplement users |                              | Frequency of using food supplements, <i>n</i> (%) of users |                   |                   |                   |                       |
|-----------------------|-----------------------|------------------------------|------------------------------------------------------------|-------------------|-------------------|-------------------|-----------------------|
|                       | Total n               | <i>n</i> (%) of participants | 7 days a week                                              | 5 - 6 days a week | 3 - 4 days a week | 1 - 2 days a week | Less than once a week |
| Prenatal multivitamin | 112                   | 97 (86.6)                    | 76 (78.4)                                                  | 10 (10.3)         | 4 (4.1)           | 6 (6.2)           | 1 (1.0)               |
| Other multivitamin    | 111                   | 28 (25.2)                    | 21 (75.0)                                                  | 2 (7.1)           | 2 (7.1)           | 0 (0.0)           | 3 (10.7)              |
| Vitamin A             | 110                   | 1 (0.9)                      | 0 (0.0)                                                    | 1 (100.0)         | 0 (0.0)           | 0 (0.0)           | 0 (0.0)               |
| Folic acid            | 111                   | 10 (9.0)                     | 7 (70.0)                                                   | 1 (10.0)          | 1 (10.0)          | 0 (0.0)           | 1 (10.0)              |
| Vitamin B12           | 111                   | 9 (8.1)                      | 6 (66.7)                                                   | 0 (0.0)           | 1 (11.1)          | 1 (11.1)          | 1 (11.1)              |
| Other vitamin B's     | 111                   | 7 (6.3)                      | 4 (57.1)                                                   | 1 (14.3)          | 0 (0.0)           | 1 (14.3)          | 1 (14.3)              |
| Vitamin C             | 111                   | 6 (5.4)                      | 3 (50.0)                                                   | 2 (33.3)          | 1 (16.7)          | 0 (0.0)           | 0 (0.0)               |
| Vitamin D             | 111                   | 20 (18.0)                    | 11 (55.0)                                                  | 2 (10.0)          | 3 (15.0)          | 3 (15.0)          | 0 (0.0)               |
| Vitamin E             | 111                   | 2 (1.8)                      | 1 (50.0)                                                   | 0 (0.0)           | 1 (50.0)          | 0 (0.0)           | 0 (0.0)               |
| Iodine                | 111                   | 2 (1.8)                      | 1 (50.0)                                                   | 0 (0.0)           | 0 (0.0)           | 0 (0.0)           | 1 (50.0)              |
| Calcium               | 112                   | 7 (6.3)                      | 4 (57.1)                                                   | 2 (28.6)          | 1 (14.3)          | 0 (0.0)           | 0 (0.0)               |
| Iron                  | 112                   | 21 (18.8)                    | 12 (57.1)                                                  | 4 (19.0)          | 1 (4.8)           | 4 (19.0)          | 0 (0.0)               |
| Zinc                  | 110                   | 2 (1.8)                      | 1 (50.0)                                                   | 1 (50.0)          | 0 (0.0)           | 0 (0.0)           | 0 (0.0)               |
| Selenium              | 111                   | 2 (1.8)                      | 1 (50.0)                                                   | 0 (0.0)           | 1 (50.0)          | 0 (0.0)           | 0 (0.0)               |
| Magnesium             | 111                   | 2 (1.8)                      | 2 (100.0)                                                  | 0 (0.0)           | 0 (0.0)           | 0 (0.0)           | 0 (0.0)               |
| Manganese             | 112                   | 10 (8.9)                     | 4 (40.0)                                                   | 1 (10.0)          | 1 (10.0)          | 1 (10.0)          | 0 (0.0)               |
| Chromium              | 111                   | 1 (0.9)                      | 0 (0.0)                                                    | 1 (100.0)         | 0 (0.0)           | 0 (0.0)           | 0 (0.0)               |

**Table S5.** Daily intakes of nutrients from food supplements with no recommended intake levels during pregnancy.

|                                            | Finland            | Italy              | Poland             | United Kingdom     |                     |
|--------------------------------------------|--------------------|--------------------|--------------------|--------------------|---------------------|
| Nutrient                                   | <i>n</i> =470      | <i>n</i> =360      | <i>n</i> =439      | <i>n</i> =97       | <i>P</i> -value     |
| <b>Betacarotene, µg/d</b>                  |                    |                    |                    |                    |                     |
| User, n (%)                                | 3 (0.6)            | 99 (27.5)          | 76 (17.3)          | 1 (1.0)            | <0.001 <sup>a</sup> |
| Dose, median (IQR)                         | 1200               | 3000 (1800 – 3000) | 3000 (1929 – 3000) | 80.1               | 0.100 <sup>b</sup>  |
| Dose, range                                | 400 - 2400         | 200 - 6000         | 180 - 6000         | -                  |                     |
| <b>Vitamin B1 (thiamin), mg/d</b>          |                    |                    |                    |                    |                     |
| User, n (%)                                | 394 (83.8)         | 271 (75.3)         | 124 (28.3)         | 77 (79.4)          | <0.001 <sup>a</sup> |
| Dose, median (IQR)                         | 5.0 (2.6 – 5.0)    | 1.1 (1.1 – 1.4)    | 1.5 (1.3 – 1.5)    | 3.0 (1.4 – 3.0)    | <0.001 <sup>b</sup> |
| Dose, range                                | 0.37 – 55.0        | 0.5 – 26.2         | 0.4 – 9.0          | 1.1 – 8.0          |                     |
| <b>Vitamin B2 (riboflavin), mg/d</b>       |                    |                    |                    |                    |                     |
| User, n (%)                                | 393 (83.6)         | 274 (76.1)         | 116 (26.4)         | 77 (79.4)          | <0.001 <sup>a</sup> |
| Dose, median (IQR)                         | 5.0 (2.8 – 5.0)    | 1.5 (1.4 – 1.7)    | 1.6 (1.6 – 1.6)    | 2.0 (1.4 – 2.0)    | <0.001 <sup>b</sup> |
| Dose, range                                | 0.5 – 55.0         | 0.6 – 15.0         | 0.7 – 20.0         | 0.9 – 8.0          |                     |
| <b>Vitamin B3 (niacin), mg/d</b>           |                    |                    |                    |                    |                     |
| User, n (%)                                | 390 (83.0)         | 269 (74.7)         | 119 (27.1)         | 65 (67.0)          | <0.001 <sup>a</sup> |
| Dose, median (IQR)                         | 20.0 (17.0 – 20.0) | 16.0 (16.0 – 22.0) | 18.0 (16.0 – 20.0) | 20.0 (20.0 – 20.0) | <0.001 <sup>b</sup> |
| Dose, range                                | 4.5 – 65.0         | 6.9 – 51.0         | 7.5 – 120.0        | 2.1 – 32.0         |                     |
| <b>Vitamin B5 (pantothenic acid), mg/d</b> |                    |                    |                    |                    |                     |
| User, n (%)                                | 390 (83.0)         | 268 (74.4)         | 120 (27.3)         | 76 (78.4)          | <0.001 <sup>a</sup> |
| Dose, median (IQR)                         | 5.0 (5.0 – 5.8)    | 6.0 (6.0 – 6.0)    | 10.0 (6.0 – 10.0)  | 6.0 (6.0 – 6.0)    | <0.001 <sup>b</sup> |

|                                      |                       |                      |                      |                      |                     |
|--------------------------------------|-----------------------|----------------------|----------------------|----------------------|---------------------|
| Dose, range                          | 1.8 – 55.0            | 2.6 – 25.0           | 3.0 – 150.0          | 2.6 – 20.0           |                     |
| <b>Vitamin B7 (biotin), µg/d</b>     |                       |                      |                      |                      |                     |
| User, n (%)                          | 343 (73.0)            | 263 (73.1)           | 105 (23.9)           | 76 (78.4)            | <0.001 <sup>a</sup> |
| Dose, median (IQR)                   | 30.0 (30.0 – 30.0)    | 50.0 (35 – 60.0)     | 100.0 (60.0 – 100.0) | 150.0 (50.0 – 150.0) | <0.001 <sup>b</sup> |
| Dose, range                          | 5.0 – 10000           | 15.0 – 525.0         | 3.0 – 500.0          | 12.0 – 225.0         |                     |
| <b>Vitamin B12 (cobalamin), µg/d</b> |                       |                      |                      |                      |                     |
| User, n (%)                          | 402 (85.5)            | 278 (77.2)           | 266 (60.6)           | 82 (84.5)            | <0.001 <sup>a</sup> |
| Dose, median (IQR)                   | 3.0 (3.0 – 3.0)       | 2.5 (2.5 – 2.6)      | 3.5 (2.6 – 4.0)      | 6.0 (2.6 – 6.0)      | <0.001 <sup>b</sup> |
| Dose, range                          | 0.3 – 1013.5          | 0.4 – 285.7          | 0.5 – 504.0          | 1.5 – 500.0          |                     |
| <b>Vitamin C, mg/d</b>               |                       |                      |                      |                      |                     |
| User, n (%)                          | 397 (84.5)            | 192 (53.3)           | 148 (33.7)           | 84 (86.6)            | <0.001 <sup>a</sup> |
| Dose, median (IQR)                   | 120.0 (102.9 – 120.0) | 100.0 (80.0 – 100.0) | 120.0 (80.0 – 180.0) | 70.0 (70.0 – 80.0)   | <0.001 <sup>b</sup> |
| Dose, range                          | 7.5 – 1082.0          | 10.0 – 2000.0        | 20.0 – 1110.0        | 30.0 – 200.0         |                     |
| <b>Vitamin K, µg/d</b>               |                       |                      |                      |                      |                     |
| User, n (%)                          | 66 (14.0)             | 17 (4.7)             | 6 (1.4)              | 73 (75.3)            | <0.001 <sup>a</sup> |
| Dose, median (IQR)                   | 90.0 (75.0 – 90.0)    | 35.0 (35.0 – 44.0)   | 100.0 (55.0 – 150.0) | 70.0 (70.0 – 70.0)   | <0.001 <sup>b</sup> |
| Dose, range                          | 25.0 – 90.0           | 21.4 – 140.0         | 40.0 – 300.0         | 20.0 – 150.0         |                     |
| <b>Iron, mg/d</b>                    |                       |                      |                      |                      |                     |
| User, n (%)                          | 406 (86.4)            | 293 (81.4)           | 349 (79.5)           | 79 (81.4)            | 0.270 <sup>a</sup>  |
| Dose, median (IQR)                   | 20.0 (20.0 – 70.0)    | 30.0 (27.0 – 41.1)   | 30.0 (27.0 – 60.0)   | 17.0 (17.0 – 17.0)   | <0.001 <sup>b</sup> |
| Dose, range                          | 2.7 – 220.0           | 2.1 – 210.0          | 7.5 – 260.0          | 7.3 – 158.0          |                     |
| <b>Manganese, mg/d</b>               |                       |                      |                      |                      |                     |
| User, n (%)                          | 85 (18.1)             | 146 (40.6)           | 89 (20.3)            | 4 (4.1)              | <0.001 <sup>a</sup> |

|                       |                    |                    |                 |                    |                     |
|-----------------------|--------------------|--------------------|-----------------|--------------------|---------------------|
| Dose, median (IQR)    | 1.8 (1.7 – 1.8)    | 2.0 (2.0 – 2.0)    | 1.0 (1.0 – 1.0) | 0.6 (0.3 – 0.9)    | <0.001 <sup>b</sup> |
| Dose, range           | 0.4 – 2.5          | 0.5 – 10.0         | 0.4 – 5.0       | 0.3 – 1.0          |                     |
| <b>Chromium, µg/d</b> |                    |                    |                 |                    |                     |
| User, n (%)           | 82 (17.4)          | 80 (22.2)          | 2 (0.5)         | 18 (18.6)          | <0.001 <sup>a</sup> |
| Dose, median (IQR)    | 25.0 (25.0 – 25.4) | 40.0 (40.0 – 40.0) | 85.0            | 40.0 (40.0 – 40.0) | <0.001 <sup>b</sup> |
| Dose, range           | 12.5 – 50.0        | 10.0 – 60.0        | 50.0 – 120.0    | 4.5 – 150.0        |                     |
| <b>Copper, mg/d</b>   |                    |                    |                 |                    |                     |
| User, n (%)           | 261 (55.5)         | 207 (57.5)         | 96 (21.9)       | 75 (77.3)          | <0.001 <sup>a</sup> |
| Dose, median (IQR)    | 1.0 (1.0 – 1.0)    | 1.2 (0.5 – 1.2)    | 1.0 (1.0 – 1.0) | 1.0 (1.0 – 1.0)    | <0.001 <sup>b</sup> |
| Dose, range           | 0.3 – 1.5          | 0.1 – 2.6          | 0.4 – 1.0       | 0.4 – 2.5          |                     |

<sup>a</sup> Comparison between the countries, Chi-square test with Bonferroni correction.

<sup>b</sup> Comparison between the countries, Kruskal-Wallis test with Bonferroni correction.
